# Supplementary material
Source: PubMed Central journal article supplement (PMC4197877)
Supplement: embr0015-0670-sd1.pdf [file embr0015-0670-sd1.pdf]

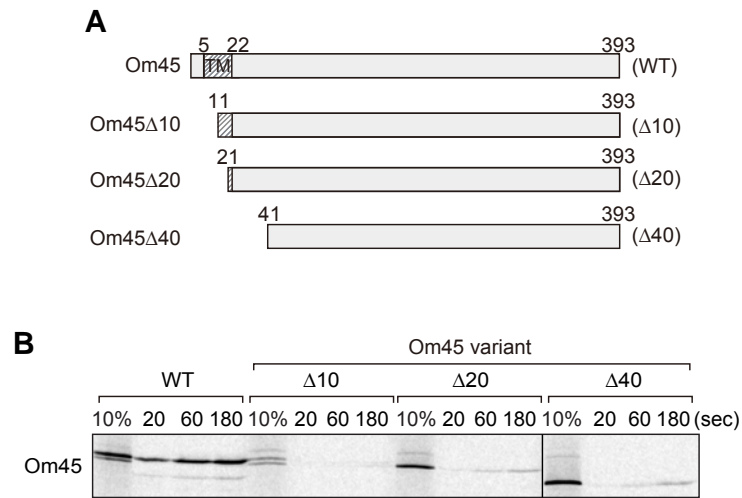

**Fig S1** | (A) A schematic diagram of Om45 variants lacking N-terminal residues. (B)  $^{35}\text{S}$ -labeled Om45 and Om45 lacking N-terminal 10, 20 or 40 residues were imported into mitochondria *in vitro* for the indicated times and PK-treated. Imported proteins were analyzed by SDS-PAGE and radioimaging.
