# Supplementary material
Source: PubMed Central journal article supplement (PMC4197877)
Supplement: embr0015-0670-sd2.pdf [file embr0015-0670-sd2.pdf]

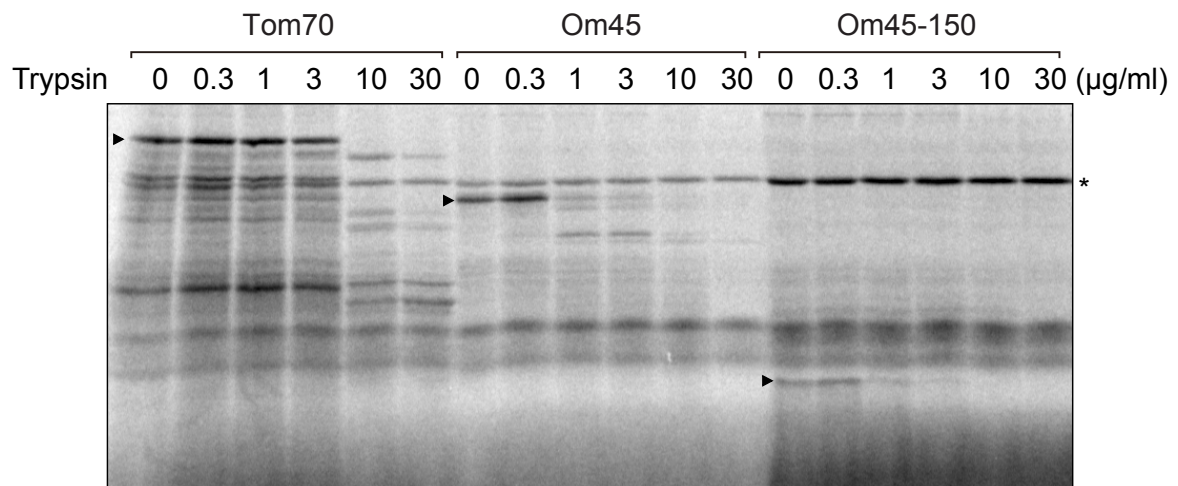

**Fig S2** | *In vitro* synthesized Om45 is less tightly folded than Tom70.  $^{35}\text{S}$ -labeled Tom70, Om45 and Om45-100 (marked with arrowheads) were synthesized *in vitro* and treated with the indicated concentrations of trypsin for 10 min on ice. After stopping trypsin digestion by adding trypsin inhibitor, the proteins were analyzed by SDS-PAGE followed by radioimaging. Asterisk represents a non-specific translation product.
