# Supplementary material
Source: PubMed Central journal article supplement (PMC4197877)
Supplement: embr0015-0670-sd3.pdf [file embr0015-0670-sd3.pdf]

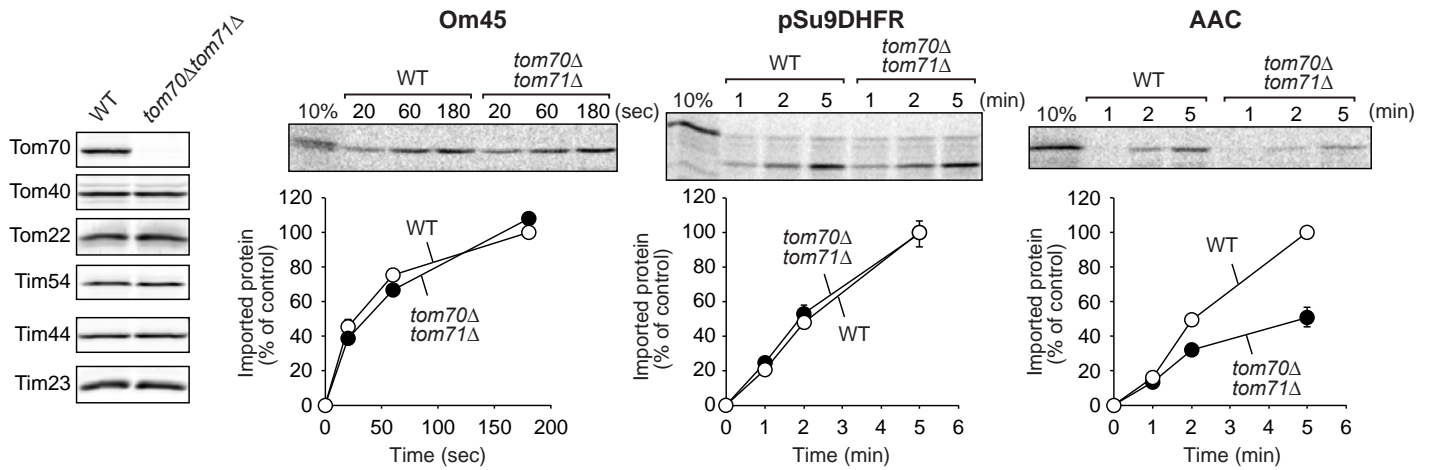

**Fig S3** | Tom70 and Tom71 are dispensable for import of Om45. Mitochondria were isolated from wild-type and *tom70Δtom71Δ* cells that were cultivated in lactate medium at 30°C. <sup>35</sup>S-labeled Om45, pSu9-DHFR and AAC were imported into these mitochondria at 25°C for the indicated time. After digestion of unimported proteins with PK, imported proteins were analyzed by SDS-PAGE followed by radioimaging. Amounts of the imported proteins at the longest incubation in control mitochondria were set to 100%. Values are mean ± SEM (n=3).
