# Supplementary material
Source: PubMed Central journal article supplement (PMC4197877)
Supplement: embr0015-0670-sd5.pdf [file embr0015-0670-sd5.pdf]

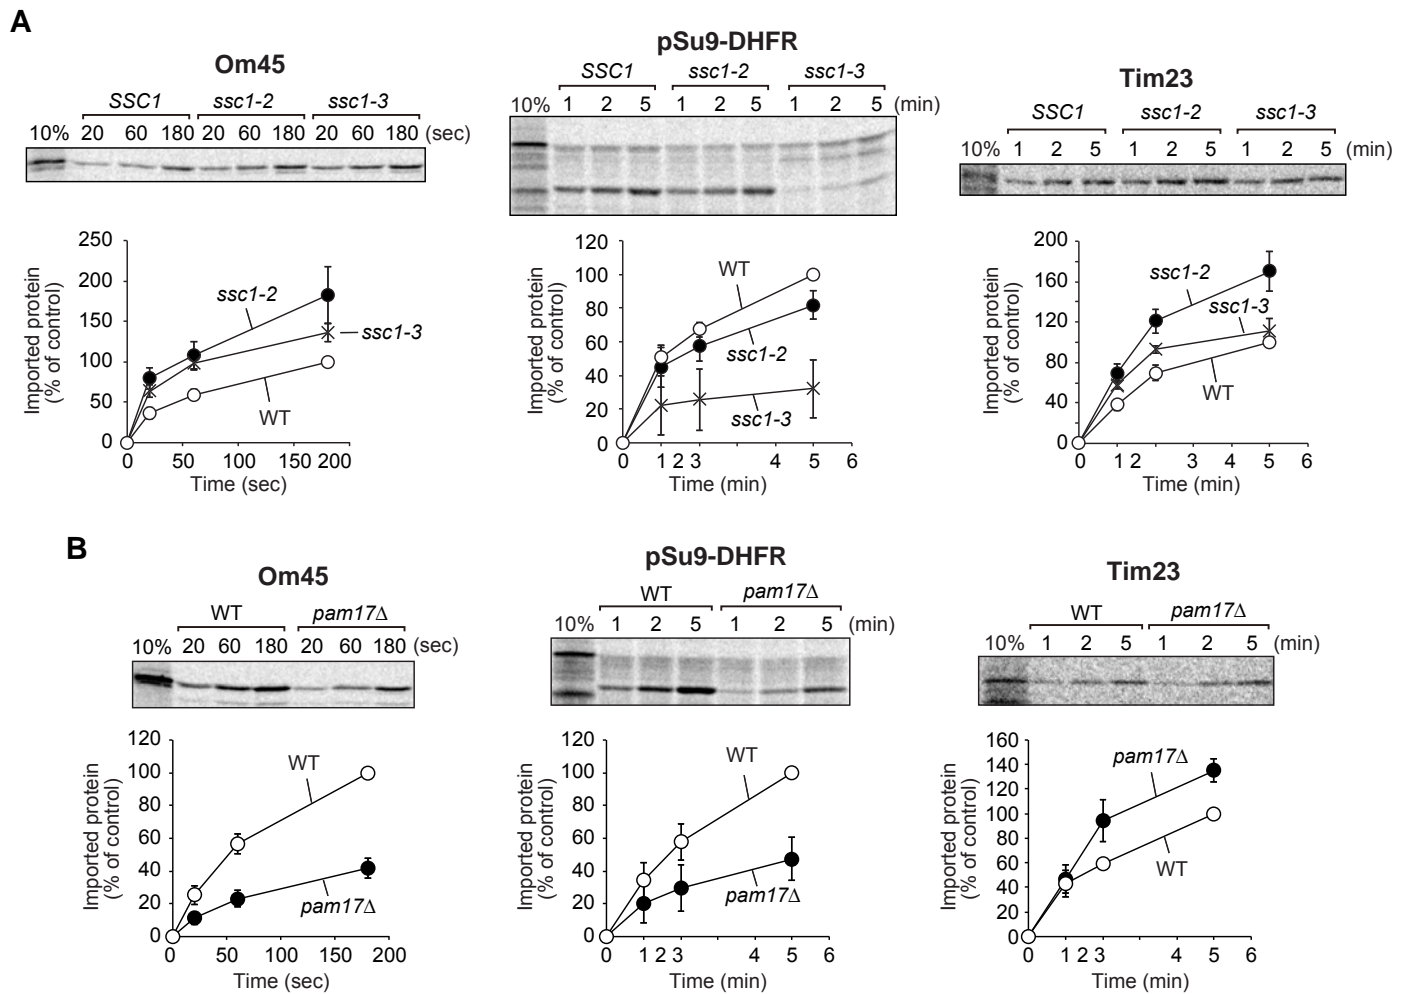

**Fig S5 | Pam17, but not mtHsp70, is involved in Om45 import.** (A) Mitochondria were isolated from wild-type (*SSC1*), *ssc1-2* and *ssc1-3* cells that were cultivated in lactate medium at 23°C. The isolated mitochondria were preincubated at 37°C before import. <sup>35</sup>S-labeled Om45, pSu9-DHFR, and Tim23 were imported into these mitochondria at 25°C for the indicated time. After digestion of unimported proteins with PK, imported proteins were analyzed by SDS-PAGE followed by radioimaging. Amounts of the imported proteins at the longest incubation in control mitochondria were set to 100%. Values are mean ± SEM (n=3). (B) Mitochondria were isolated from wild-type or *pam17Δ* cells that were cultivated in lactate media at 30°C. <sup>35</sup>S-labeled Om45, pSu9-DHFR, and Tim23 were imported into these mitochondria at 25°C and analyzed as in A.
